# Supplementary material
Source: Research Square preprint supplement (doi:10.21203/rs.3.rs-8977907/v1)
Supplement: Supplementary file 1 [file 5699c717920b16b72f4b4ef8.docx]

### Table S1 Multivariate Logistic regression analysis for therapeutic efficacy

| Variables | β | S.E | Z | *P* | OR (95%CI) |
| --- | --- | --- | --- | --- | --- |
|
| Intercept | 30.44 | 3661.57 | 0.01 | 0.99 | 16617337459390.61 (0.00 ~ Inf) |
| Sex |  |  |  |  |  |
| Male |  |  |  |  | 1.00 (Reference) |
| Female | 5.51 | 3.70 | 1.49 | 0.14 | 246.89 (0.17 ~ 350635.04) |
| Age |  |  |  |  |  |
| <=40 |  |  |  |  | 1.00 (Reference) |
| >40 | -2.79 | 1.82 | -1.53 | 0.13 | 0.06 (0.00 ~ 2.18) |
| BMI |  |  |  |  |  |
| <25 |  |  |  |  | 1.00 (Reference) |
| >=25 | -3.77 | 3.26 | -1.16 | 0.25 | 0.02 (0.00 ~ 13.56) |
| TBSA |  |  |  |  |  |
| <=30 |  |  |  |  | 1.00 (Reference) |
| >30 | -3.09 | 3.12 | -0.99 | 0.32 | 0.05 (0.00 ~ 20.52) |
| Etiology |  |  |  |  |  |
| Flame Burns |  |  |  |  | 1.00 (Reference) |
| Scalds | -1.13 | 2.71 | -0.42 | 0.68 | 0.32 (0.00 ~ 65.21) |
| Explosion | 0.60 | 2.23 | 0.27 | 0.79 | 1.82 (0.02 ~ 143.23) |
| Electric burns | -1.38 | 3.16 | -0.44 | 0.66 | 0.25 (0.00 ~ 122.19) |
| Treat Sites |  |  |  |  |  |
| Lower Limbs |  |  |  |  | 1.00 (Reference) |
| Upper Limbs | 0.89 | 2.58 | 0.34 | 0.73 | 2.43 (0.02 ~ 379.44) |
| Scar Area |  |  |  |  |  |
| <=1 |  |  |  |  | 1.00 (Reference) |
| >1 | 0.44 | 1.73 | 0.25 | 0.80 | 1.55 (0.05 ~ 46.19) |
| Operation |  |  |  |  |  |
| >=1 |  |  |  |  | 1.00 (Reference) |
| 0 | -3.88 | 3.12 | -1.24 | 0.21 | 0.02 (0.00 ~ 9.37) |
| Interval Time |  |  |  |  |  |
| <=90 |  |  |  |  | 1.00 (Reference) |
| >90 | 0.51 | 2.40 | 0.21 | 0.83 | 1.66 (0.02 ~ 181.90) |
| Severity |  |  |  |  |  |
| Extremely severe |  |  |  |  | 1.00 (Reference) |
| Moderate | -28.70 | 3661.57 | -0.01 | 0.99 | 0.00 (0.00 ~ Inf) |
| Severe | -28.17 | 3661.57 | -0.01 | 0.99 | 0.00 (0.00 ~ Inf) |
| OR: Odds Ratio, CI: Confidence Interval | | | | | |
